# Supplementary material for: Stereoselective synthesis of light-activatable perfluorophenylazide-conjugated carbohydrates for glycoarray fabrication and evaluation of structural effects on protein binding by SPR imaging
Source: Royal Society of Chemistry journal article supplement (doi:10.1039/c1ob05040k), 2011-01-01
Supplement: c1ob05040k.pdf [file c1ob05040k.pdf]

## Electronic Supplementary Information

# Stereoselective Synthesis of Light-Activatable Perfluorophenylazide-Conjugated Carbohydrates for Glycoarray Fabrication and Evaluation of Structural Effects on Protein Binding by SPR Imaging

Lingquan Deng<sup>a</sup>, Oscar Norberg<sup>a</sup>, Suji Uppalapati<sup>b</sup>, Mingdi Yan<sup>b,\*</sup> and Olof Ramström<sup>a,\*</sup>

<sup>a</sup>*KTH - Royal Institute of Technology, Department of Chemistry, Teknikringen 30, S-10044, Stockholm, Sweden.  
Fax: +46 8 7912333; E-mail: [ramstrom@kth.se](mailto:ramstrom@kth.se)*

<sup>b</sup>*Department of Chemistry, Portland State University, P.O. Box 751, Portland, Oregon 97207-0751  
USA. Fax: +1 503 725-9525; E-mail: [yanm@pdx.edu](mailto:yanm@pdx.edu)*

### Table of contents

|                                                                          |     |
|--------------------------------------------------------------------------|-----|
| <sup>1</sup> H-NMR and <sup>13</sup> C-NMR spectra of compound <b>14</b> | S2  |
| <sup>1</sup> H-NMR and <sup>13</sup> C-NMR spectra of compound <b>18</b> | S3  |
| <sup>1</sup> H-NMR and <sup>13</sup> C-NMR spectra of compound <b>21</b> | S4  |
| <sup>1</sup> H-NMR and <sup>13</sup> C-NMR spectra of compound <b>22</b> | S5  |
| <sup>1</sup> H-NMR and <sup>13</sup> C-NMR spectra of compound <b>24</b> | S6  |
| <sup>1</sup> H-NMR and <sup>13</sup> C-NMR spectra of compound <b>25</b> | S7  |
| <sup>1</sup> H-NMR and <sup>13</sup> C-NMR spectra of compound <b>26</b> | S8  |
| <sup>1</sup> H-NMR and <sup>13</sup> C-NMR spectra of compound <b>2</b>  | S9  |
| <sup>1</sup> H-NMR and <sup>13</sup> C-NMR spectra of compound <b>3</b>  | S10 |
| <sup>1</sup> H-NMR and <sup>13</sup> C-NMR spectra of compound <b>4</b>  | S11 |
| SPR imaging                                                              | S12 |

**$^1\text{H-NMR}$  and  $^{13}\text{C-NMR}$  spectra of compound **14****

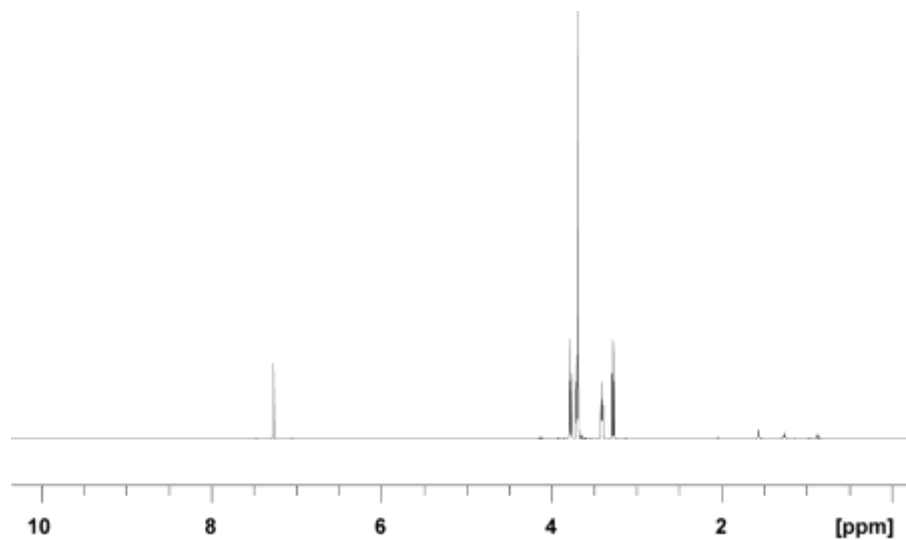

**Figure S1.**  $^1\text{H-NMR}$  spectrum of compound **14** in  $\text{CDCl}_3$  (500 MHz)

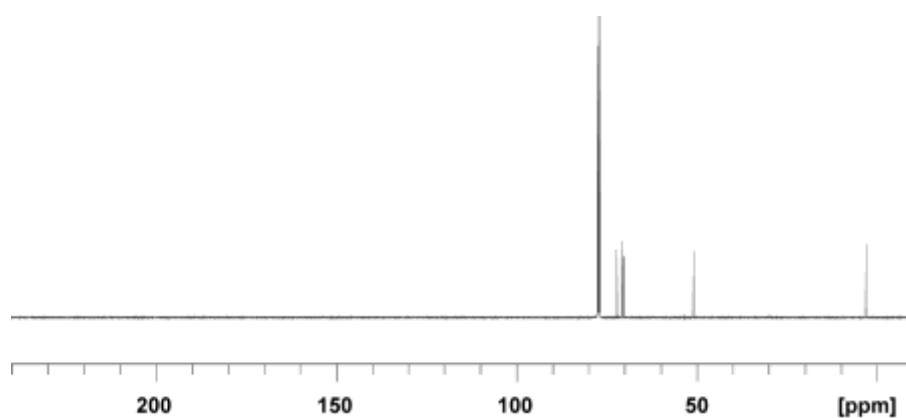

**Figure S2.**  $^{13}\text{C-NMR}$  spectrum of compound **14** in  $\text{CDCl}_3$  (125 MHz)

### $^1\text{H}$ -NMR and $^{13}\text{C}$ -NMR spectra of compound **18**

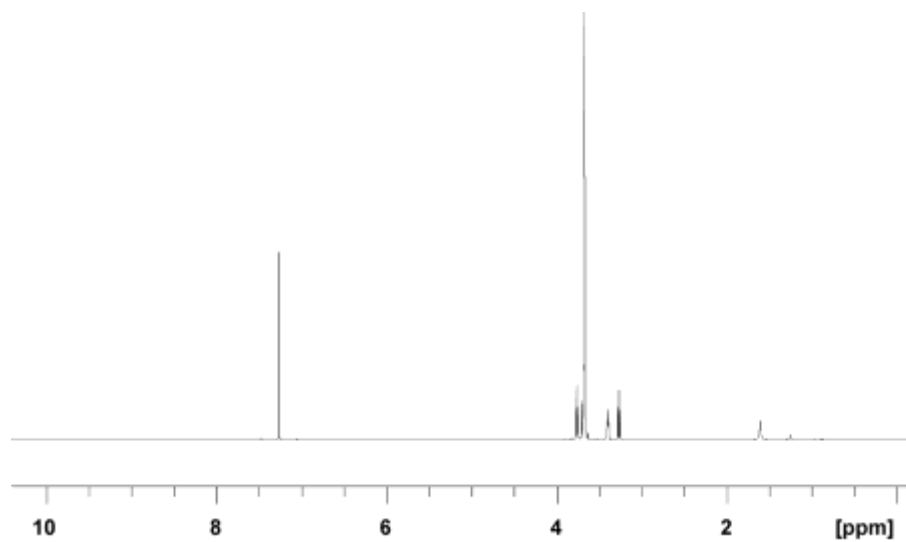

**Figure S3.**  $^1\text{H}$ -NMR spectrum of compound **18** in  $\text{CDCl}_3$  (500 MHz)

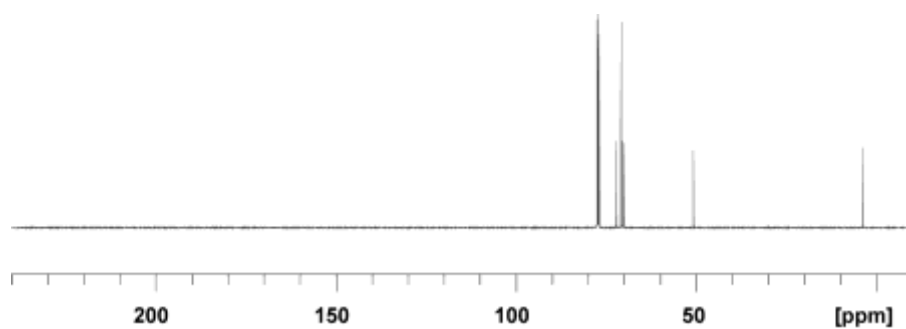

**Figure S4.**  $^{13}\text{C}$ -NMR spectrum of compound **18** in  $\text{CDCl}_3$  (125 MHz)

### $^1\text{H}$ -NMR and $^{13}\text{C}$ -NMR spectra of compound **21**

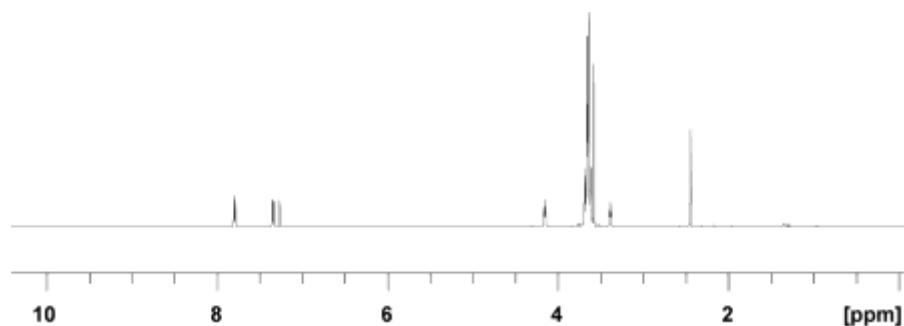

**Figure S5.**  $^1\text{H}$ -NMR spectrum of compound **21** in  $\text{CDCl}_3$  (500 MHz)

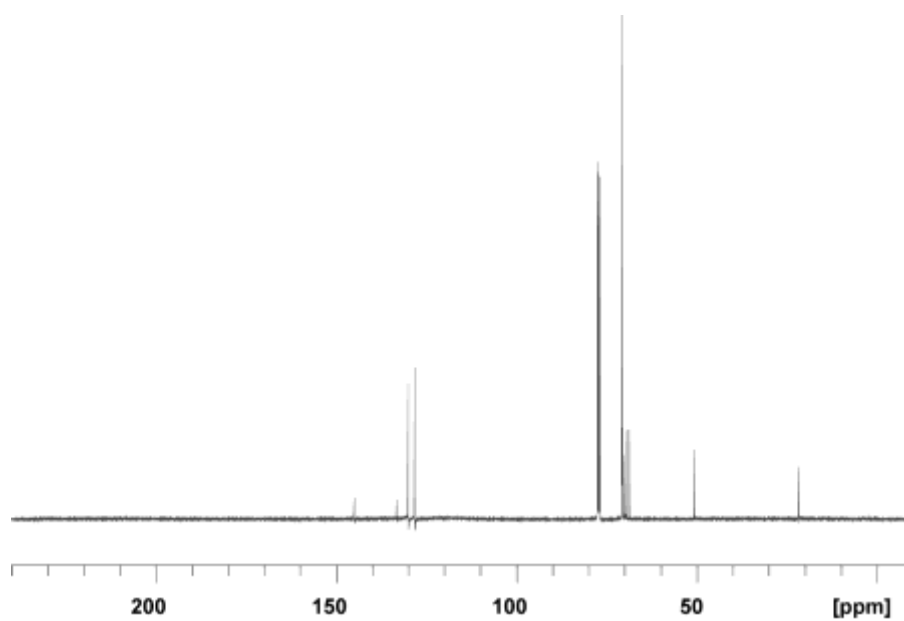

**Figure S6.**  $^{13}\text{C}$ -NMR spectrum of compound **21** in  $\text{CDCl}_3$  (125 MHz)

**$^1\text{H}$ -NMR and  $^{13}\text{C}$ -NMR spectra of compound **22****

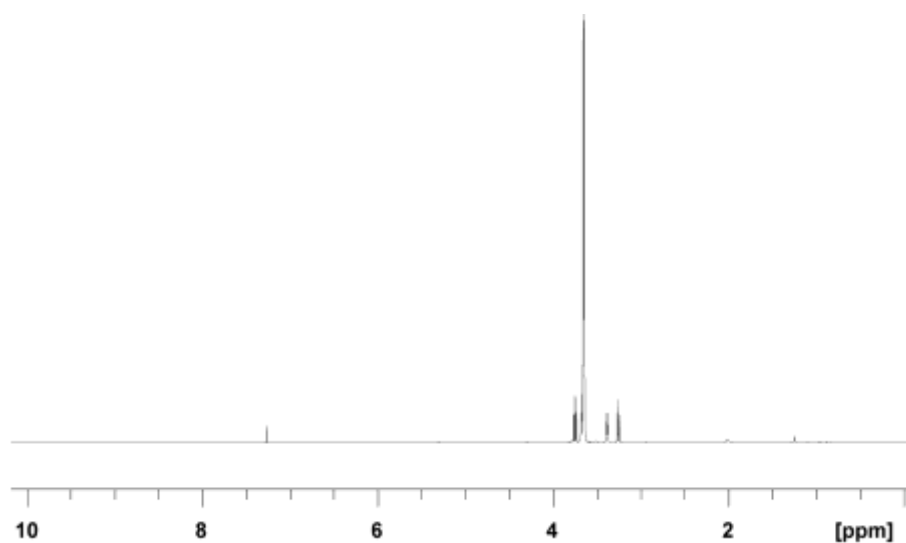

**Figure S7.**  $^1\text{H}$ -NMR spectrum of compound **22** in  $\text{CDCl}_3$  (500 MHz)

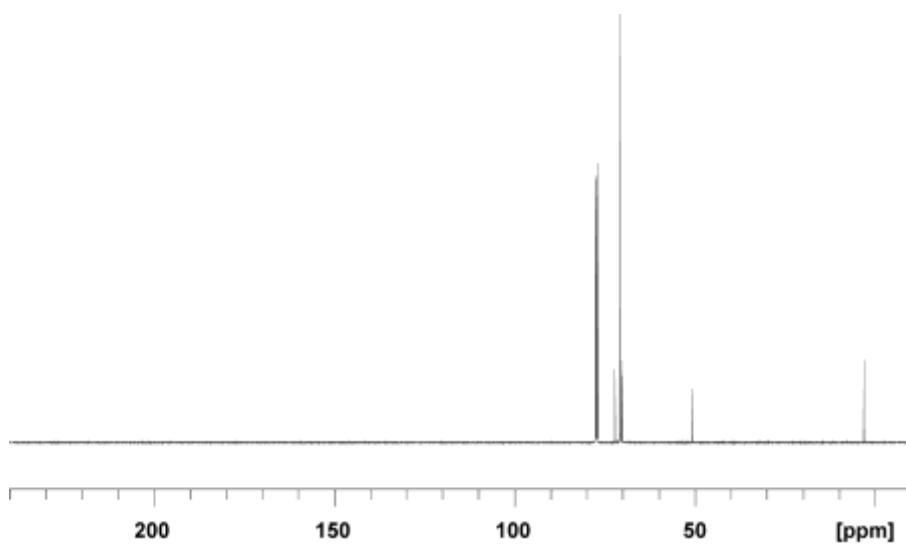

**Figure S8.**  $^{13}\text{C}$ -NMR spectrum of compound **22** in  $\text{CDCl}_3$  (125 MHz)

### $^1\text{H}$ -NMR and $^{13}\text{C}$ -NMR spectra of compound **24**

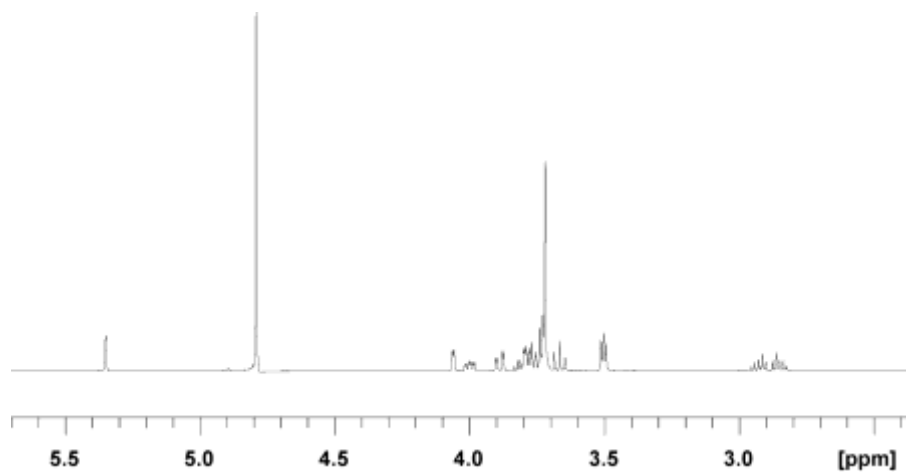

**Figure S9.**  $^1\text{H}$ -NMR spectrum of compound **24** in  $\text{D}_2\text{O}$  (500 MHz)

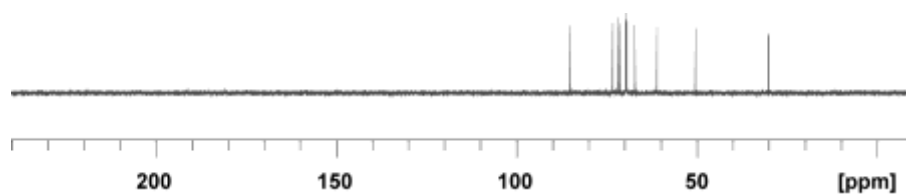

**Figure S10.**  $^{13}\text{C}$ -NMR spectrum of compound **24** in  $\text{D}_2\text{O}$  (125 MHz)

**$^1\text{H}$ -NMR and  $^{13}\text{C}$ -NMR spectra of compound 25**

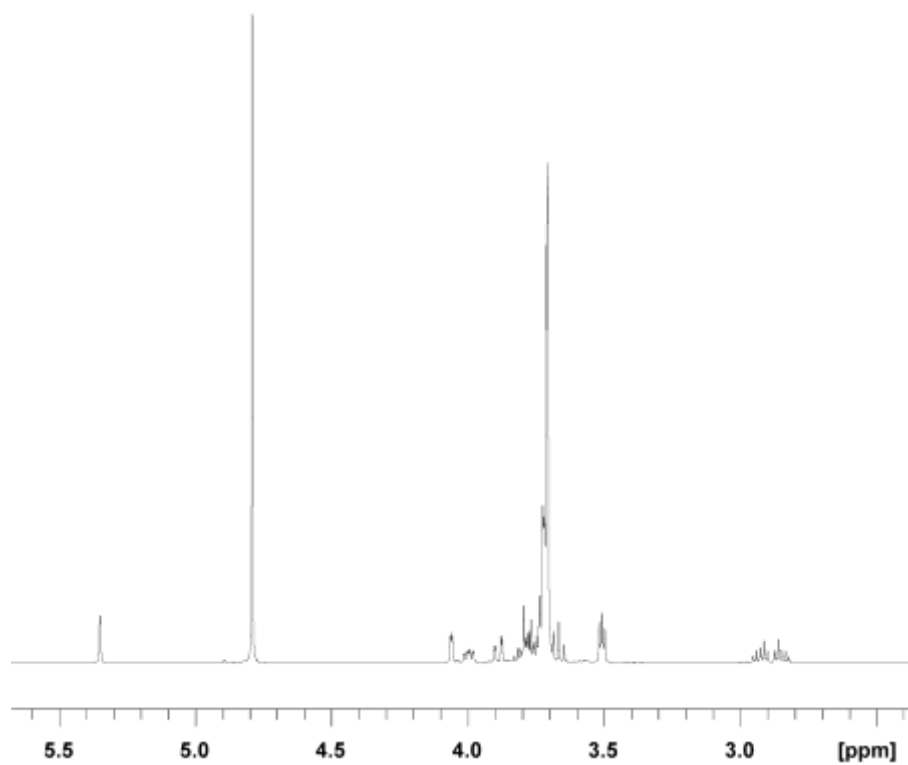

**Figure S11.**  $^1\text{H}$ -NMR spectrum of compound **25** in  $\text{D}_2\text{O}$  (500 MHz)

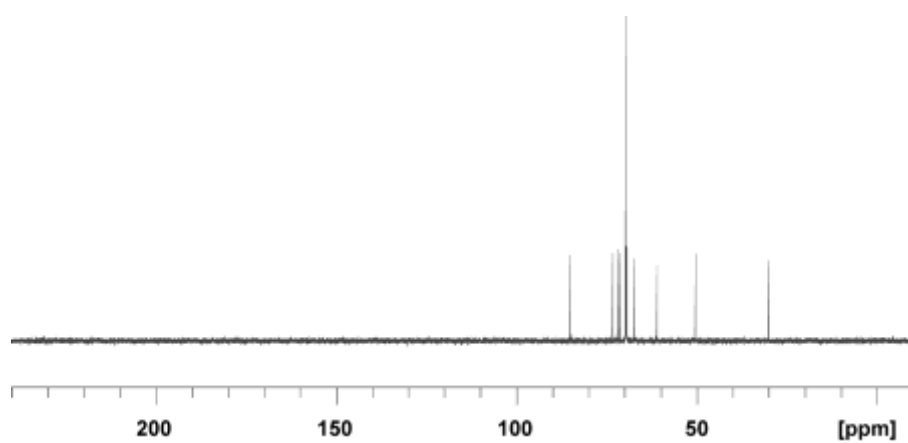

**Figure S12.**  $^{13}\text{C}$ -NMR spectrum of compound **25** in  $\text{D}_2\text{O}$  (125 MHz)

**$^1\text{H}$ -NMR and  $^{13}\text{C}$ -NMR spectra of compound **26****

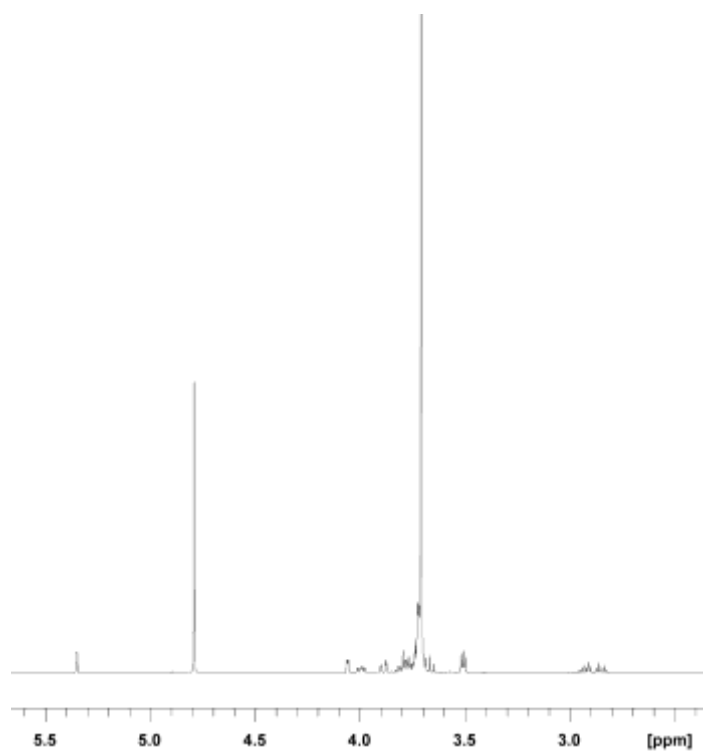

**Figure S13.**  $^1\text{H}$ -NMR spectrum of compound **26** in  $\text{D}_2\text{O}$  (500 MHz)

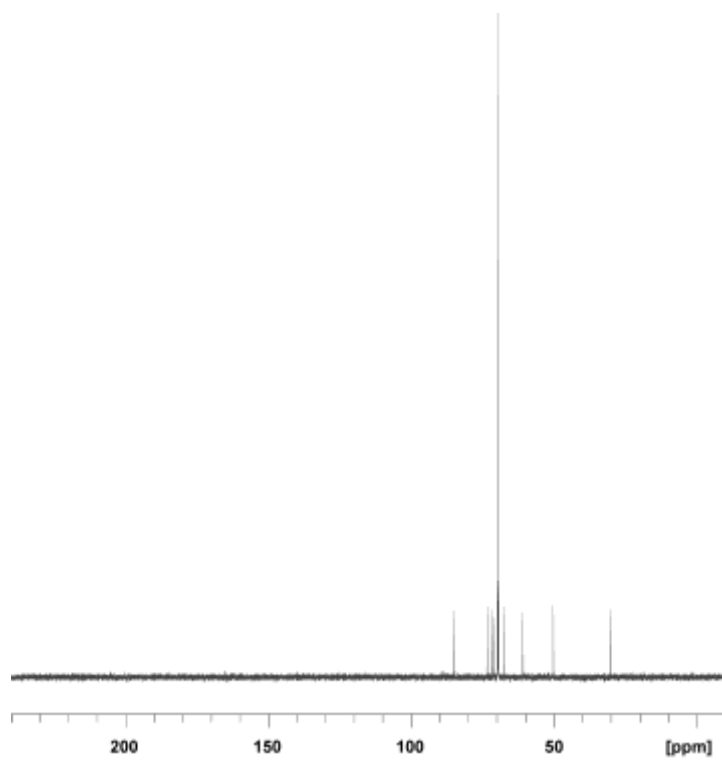

**Figure S14.**  $^{13}\text{C}$ -NMR spectrum of compound **26** in  $\text{D}_2\text{O}$  (125 MHz)



### $^1\text{H}$ -NMR and $^{13}\text{C}$ -NMR spectra of compound **2**

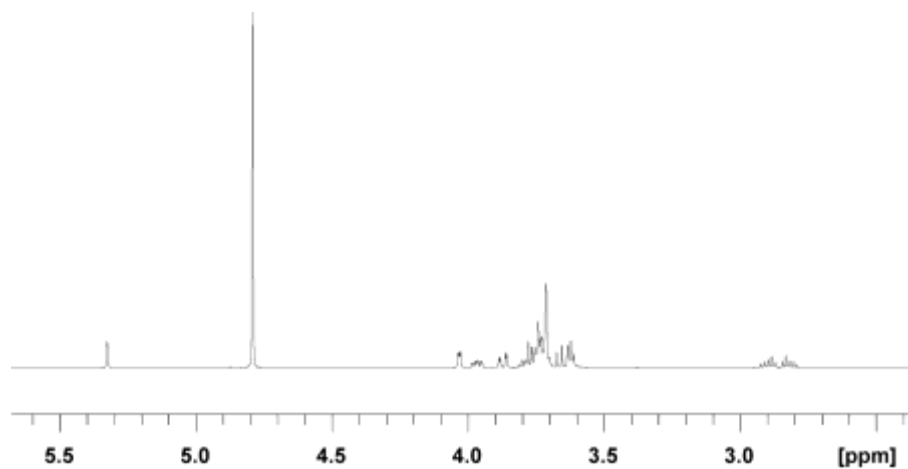

**Figure S15.**  $^1\text{H}$ -NMR spectrum of compound **2** in  $\text{D}_2\text{O}$  (500 MHz)

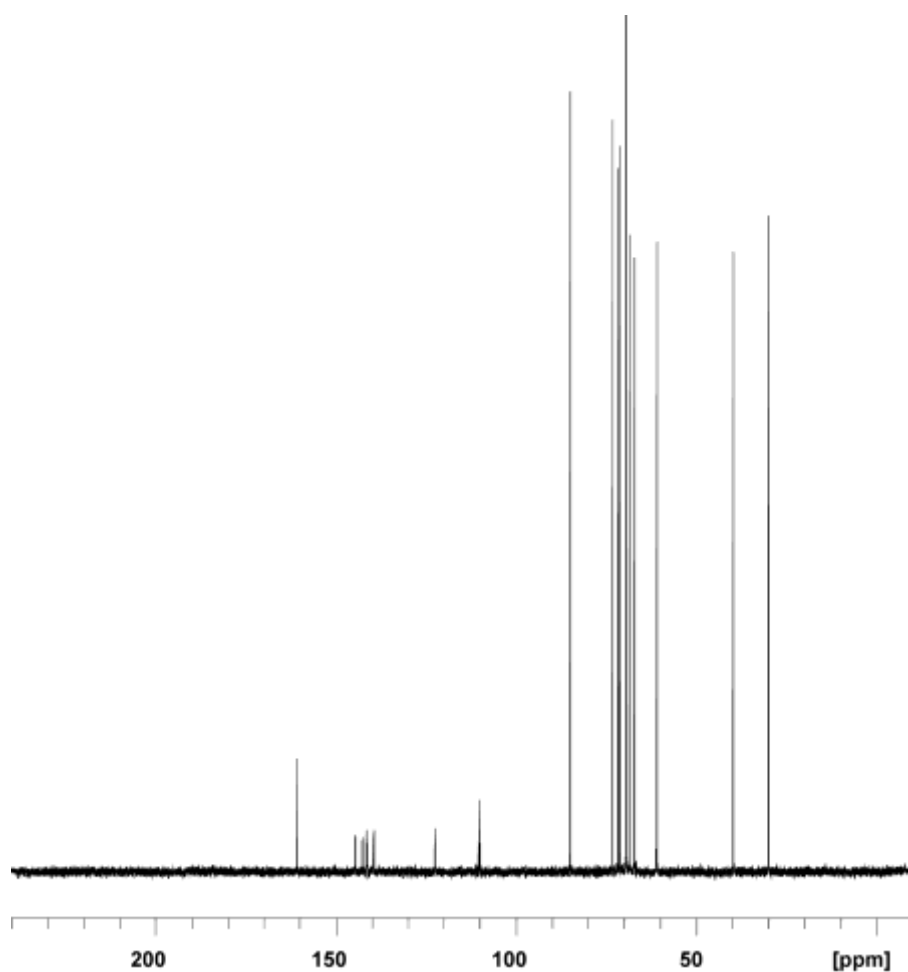

**Figure S16.**  $^{13}\text{C}$ -NMR spectrum of compound **2** in  $\text{D}_2\text{O}$  (125 MHz)

### $^1\text{H}$ -NMR and $^{13}\text{C}$ -NMR spectra of compound **3**

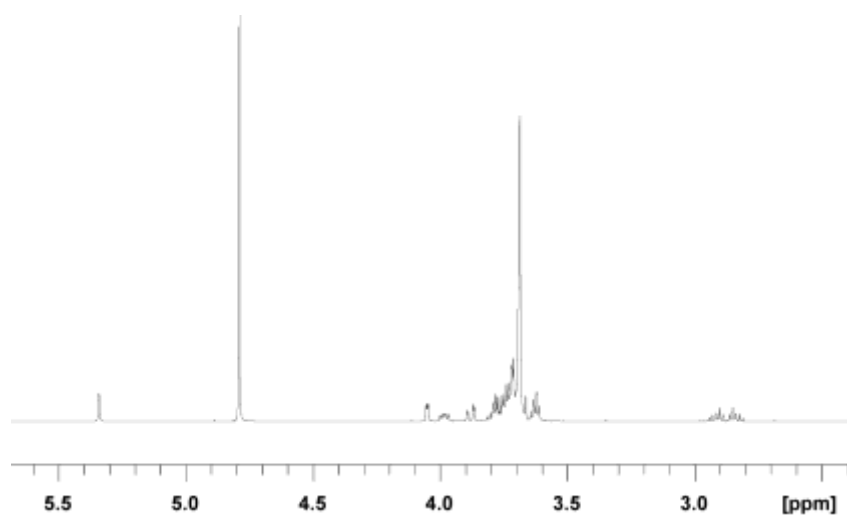

**Figure S17.**  $^1\text{H}$ -NMR spectrum of compound **3** in  $\text{D}_2\text{O}$  (500 MHz)

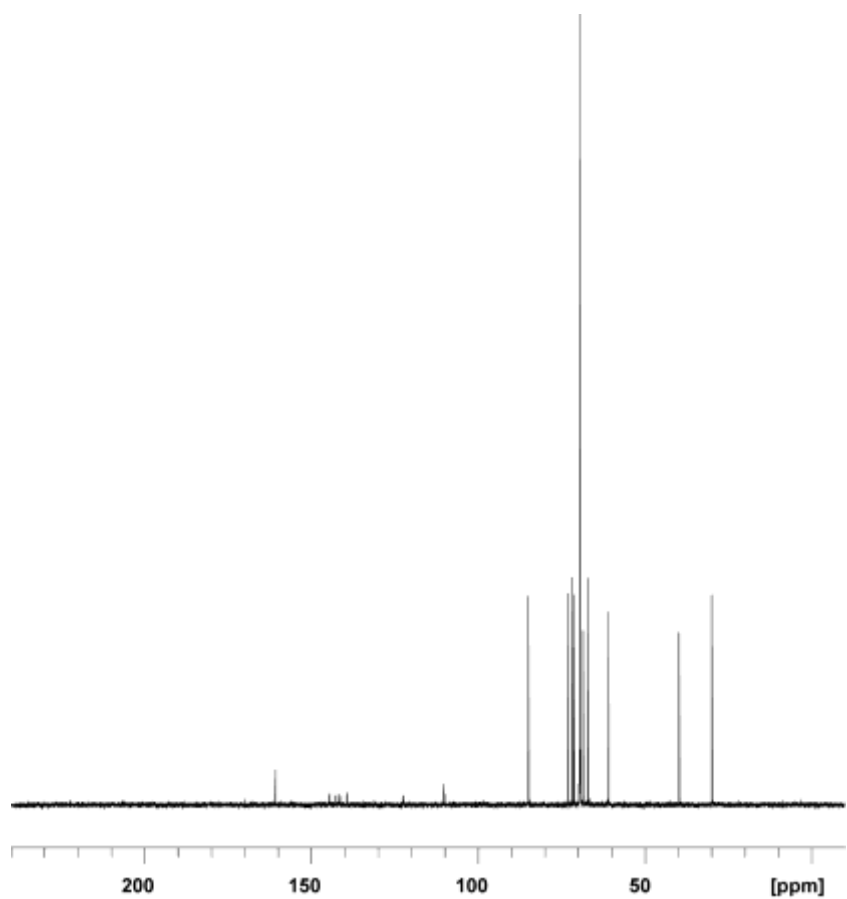

**Figure S18.**  $^{13}\text{C}$ -NMR spectrum of compound **3** in  $\text{D}_2\text{O}$  (125 MHz)

**$^1\text{H-NMR}$  and  $^{13}\text{C-NMR}$  spectra of compound 4**

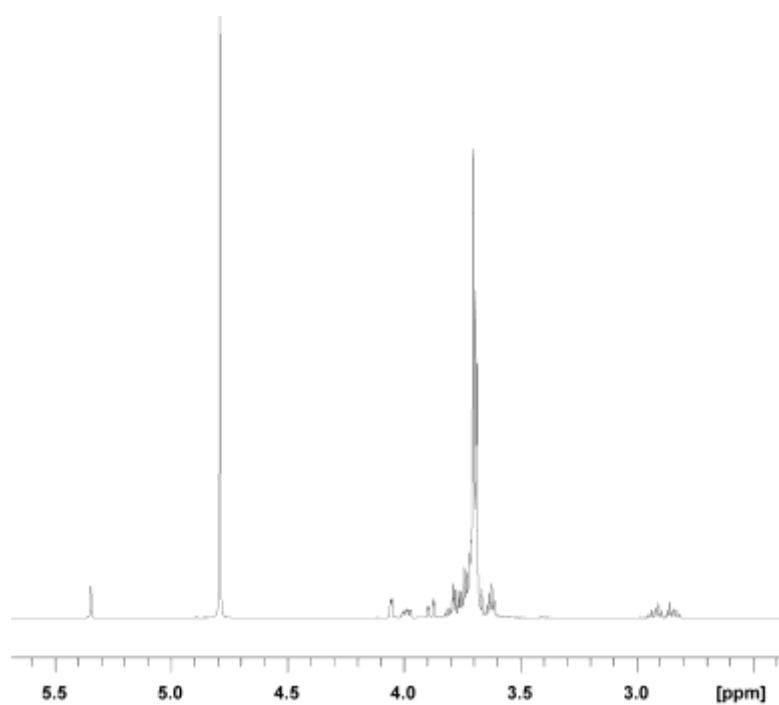

**Figure S19.**  $^1\text{H-NMR}$  spectrum of compound 4 in  $\text{D}_2\text{O}$  (500 MHz)

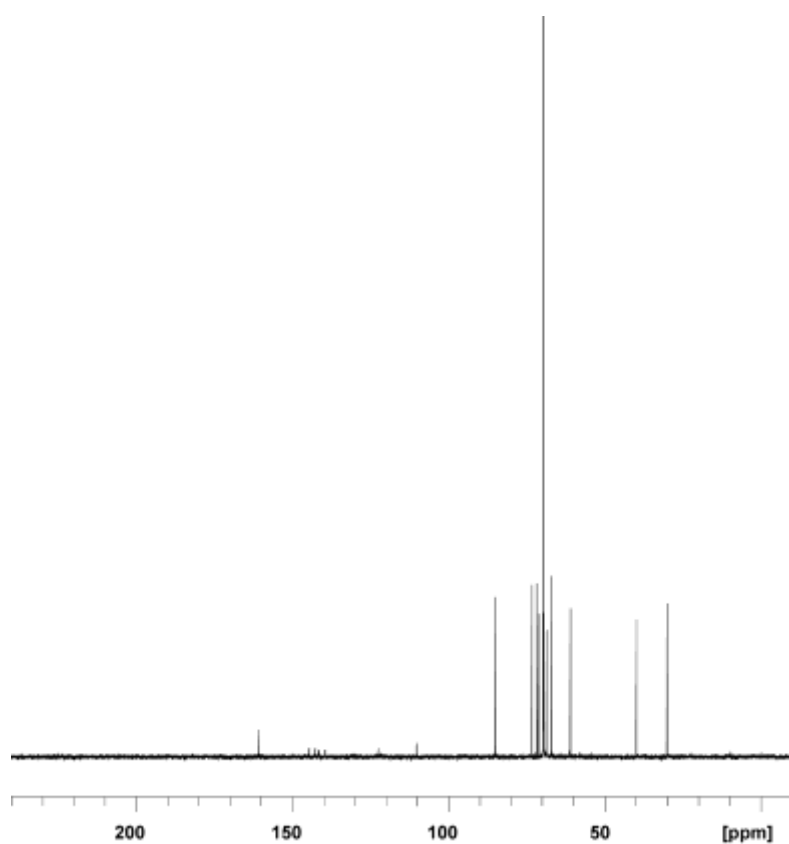

**Figure S20.**  $^{13}\text{C-NMR}$  spectrum of compound 4 in  $\text{D}_2\text{O}$  (125 MHz)

## SPR imaging

Printing concentration: A  $6 \times 6$  array pattern of the PFPA-carbohydrate conjugates was created with six different concentrations of each compound (Figure S21). Printing solutions of 2-20 mM were employed, and the resulting sensor was treated by an interrogating solution of 10  $\mu$ M of Con A. The sequence of steps followed during SPR measurements were as follows: 1) PBS with 0.1% tween 20, 2) 0.2% BSA in PBS with 0.1% tween 20, 3) PBS with 0.1% tween 20, 4) Con A in PBS with 0.1 % tween 20, 5) PBS with 0.1% tween 20, 6) 8 M urea in water, 7) PBS with 0.1% tween 20. Regeneration of the surface was achieved by treating the surfaces with 8 M urea to remove bound Con A. Repetitive regeneration provided consistent results, demonstrating the robustness of the sensor surfaces.

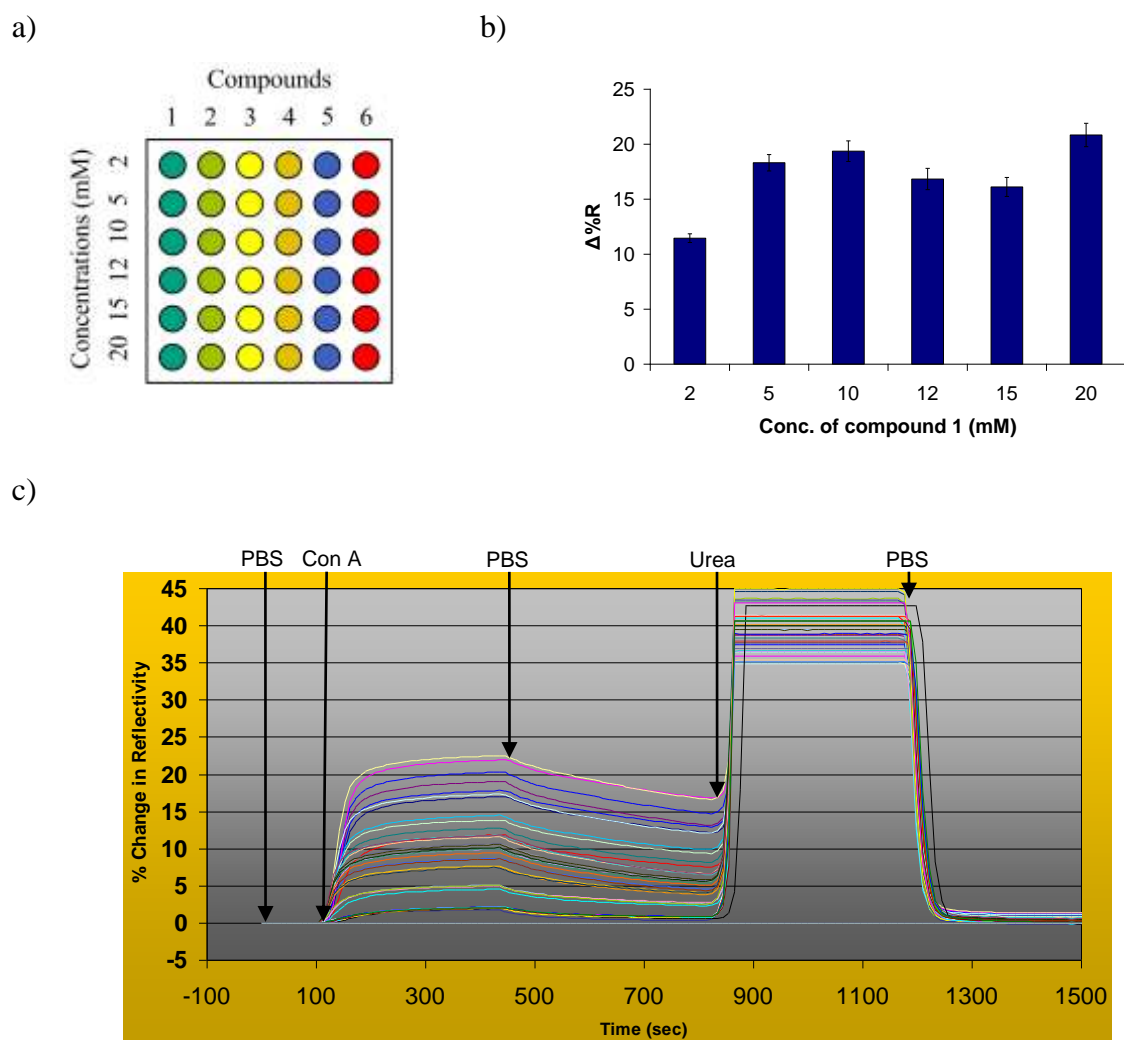

**Figure S21.** a)  $6 \times 6$  array pattern of the PFPA-carbohydrate conjugates; b) SPRi responses of compound **1** toward Con A interrogation. Each data point was the average of two binding measurements; c) Corresponding SPRi binding curves.

Con A interrogation: A  $6 \times 6$  array pattern of the PFPA-carbohydrate conjugates was created, with every horizontal column containing six different compounds while each vertical column 10 mM of a single compound (Figure S22). The resulting sensor was then treated by an interrogating solution of 10  $\mu$ M of Con A. The sequence of steps followed during SPR measurements were as follows: 1) PBS with 0.1% tween 20, 2) 0.2% BSA in PBS with 0.1% tween 20, 3) PBS with 0.1% tween 20, 4) Con A in PBS with 0.1% tween 20, 5) PBS with 0.1% tween 20, 6) 8 M urea in water, 7) PBS with 0.1% tween 20.

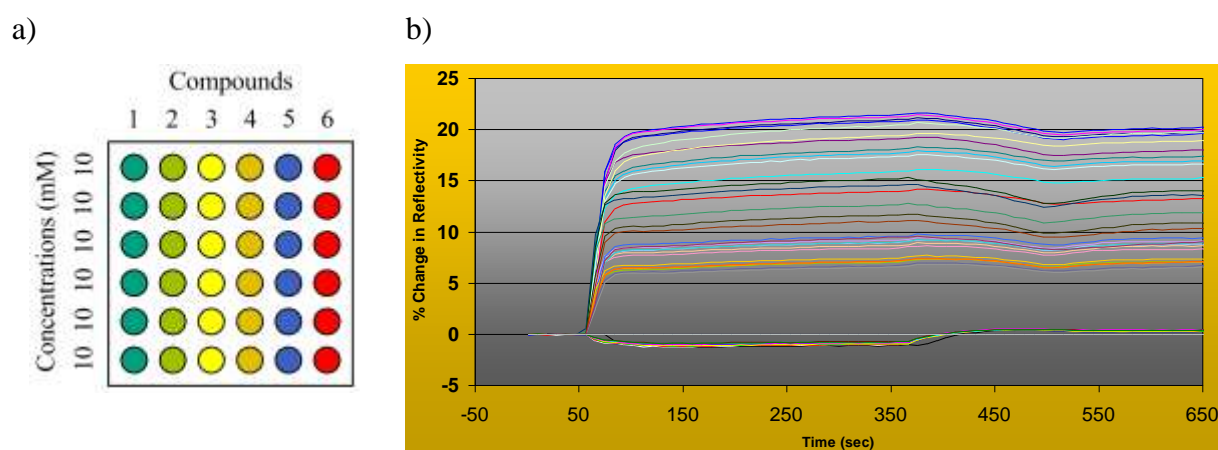

**Figure S22.** (a)  $6 \times 6$  array pattern of the PFPA-carbohydrate conjugates, probe concentration fixed at 10 mM; (b) SPRi binding curves for 10  $\mu$ M of Con A interrogation.

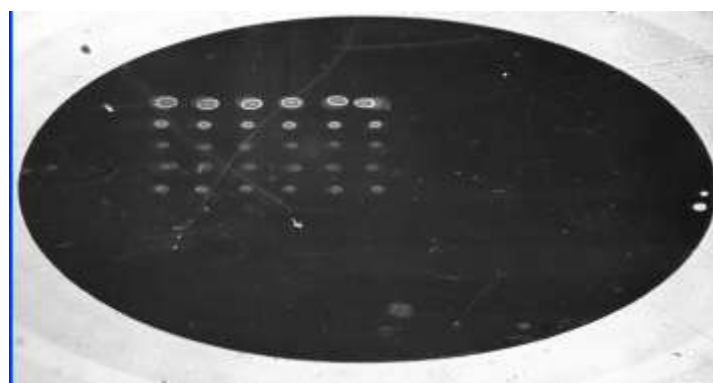

**Figure S23.** SPRi image of printed array for 10  $\mu$ M of Con A interrogation. The array contained the six glycoconjugates **1-6**, printed in a  $6 \times 6$  pattern.
